# Supplementary material for: Calorie-Restricted Mediterranean and Low-Fat Diets Affect Fatty Acid Status in Individuals with Nonalcoholic Fatty Liver Disease
Source: PubMed Central journal article supplement (PMC7822481; doi:10.3390/nu13010015), 2020-12-23
Supplement: nutrients-13-00015-s001.pdf [file nutrients-13-00015-s001.pdf]

**Table S1.** Summary of Dietary Recommendations to Participants and Compositions of Mediterranean diet and low-fat diet.

| <b>Mediterranean diet</b>                       |                                                      | <b>Low-fat diet</b>                             |                    |
|-------------------------------------------------|------------------------------------------------------|-------------------------------------------------|--------------------|
| carbohydrates                                   | 50% en                                               | carbohydrates                                   | 60% en             |
| proteins                                        | 15% en                                               | proteins                                        | 15% en             |
| total fats                                      | >30% en                                              | total fats                                      | ≤25% en            |
| saturated                                       | <8% en                                               | saturated                                       | <10% en            |
| monounsaturat                                   | >15% en                                              | monounsaturated                                 | >10% en            |
| polyunsaturated                                 | >5% en                                               | polyunsaturated                                 | >5 % en            |
| <b>Recommended</b>                              | <b>Goal</b>                                          | <b>Recommended</b>                              | <b>Goal</b>        |
| Fresh fruit                                     | 3 serving/day                                        | Fresh fruit                                     | 3 servings/day     |
| Vegetable                                       | 2 servings/day                                       | Vegetable                                       | 2 servings/day     |
| Nuts                                            | 20 g/daily (10g walnuts, 5 g hazelnuts, 5 g almonds) | Low fat dairy products                          | 3 servings/day     |
| Whole grain (legumes, rice, maize, wheat)       | 300 g/day                                            | Bread, potatoes, pasta, rice                    | 3 servings/day     |
| Olive oil                                       | Main source of fat<br>≥4 tablespoons/day             | Lean fish and seafood                           | 2 servings/week    |
| Fish (especially fatty fish), seafood           | ≥300g/ week                                          | <b>Discouraged</b>                              | <b>Goal</b>        |
| White meat                                      | Instead of red meat                                  | Vegetable oils (including olive oil)            | ≤2 tablespoons/day |
| <b>Discouraged</b>                              | <b>Goal</b>                                          | Spread fats                                     | ≤1serving/week     |
| Soda drinks                                     | ≤1 drink/day                                         | Red and processed fatty meat                    | ≤1serving/week     |
| Commercial bakery products, sweets and pastries | ≤3serving/week                                       | Fatty fish, seafood canned in oil               | 1serving/week      |
| Spread fats                                     | ≤1serving/day                                        | Commercial bakery products, sweets and pastries | ≤1serving/week     |
| Red and processed meats                         | ≤1serving/day                                        | Nuts and fried snacks                           | ≤1serving/week     |
| <b>Not allowed</b>                              |                                                      |                                                 |                    |
| butter                                          |                                                      |                                                 |                    |
| sour cream                                      |                                                      |                                                 |                    |
| lard                                            |                                                      |                                                 |                    |

**Table S2.** Univariate linear regression analysis of the markers of hepatic status after 3-months dietary intervention with Med diet of Low-fat diet (dependent variables) and changes in anthropometric and biochemical parameters (independent variables).

|                                    |             | Linear Regression Analysis        |         |          |                     |         |          |                  |         |          |                 |         |          |                        |         |          |
|------------------------------------|-------------|-----------------------------------|---------|----------|---------------------|---------|----------|------------------|---------|----------|-----------------|---------|----------|------------------------|---------|----------|
|                                    |             | Mediterranean diet                |         |          |                     |         |          |                  |         |          |                 |         |          |                        |         |          |
| Independent variables (predictors) |             | $\Delta$ BMI (kg/m <sup>2</sup> ) |         |          | $\Delta$ Body fat % |         |          | $\Delta$ WC (cm) |         |          | $\Delta$ HOMAIR |         |          | $\Delta$ hs-CRP (mg/l) |         |          |
|                                    |             | B                                 | $\beta$ | <i>p</i> | B                   | $\beta$ | <i>p</i> | B                | $\beta$ | <i>p</i> | B               | $\beta$ | <i>p</i> | B                      | $\beta$ | <i>p</i> |
| Dependent variable                 | VAI         | 0.353                             | 0.867   | 0.150    | -0.178              | -1.414  | 0.025    | 0.038            | 0.205   | 0.593    | -0.321          | -0.877  | 0.016    | 0.104                  | 0.100   | 0.710    |
|                                    | LAP         | 20.608                            | 1.088   | 0.087    | -7.567              | -1.294  | 0.037    | -1.511           | -0.175  | 0.651    | -14.103         | -0.827  | 0.021    | -1.543                 | -0.032  | 0.906    |
|                                    | HSI         | -1.941                            | -0.530  | 0.607    | 0.553               | 0.489   | 0.602    | 0.087            | 0.052   | 0.941    | 0.586           | 0.178   | 0.729    | -1.059                 | -0.114  | 0.819    |
|                                    | FLI         | 11.102                            | 0.547   | 0.322    | -6.395              | -1.020  | 0.048    | 0.429            | 0.046   | 0.899    | -16.528         | -0.904  | 0.012    | -1.009                 | -0.020  | 0.939    |
|                                    | AST(IU/L)   | 3.938                             | 2.990   | 0.236    | -1.809              | -1.298  | 0.044    | -0.069           | -0.034  | 0.944    | -1.991          | -0.490  | 0.190    | -0.848                 | -0.074  | 0.826    |
|                                    | ALT(IU/L)   | 2.258                             | 0.310   | 0.734    | -1.098              | -0.488  | 0.560    | -1.201           | -0.362  | 0.569    | -0.009          | -0.001  | 0.998    | -2.575                 | -0.139  | 0.754    |
|                                    | TG (mmol/l) | 0.405                             | 0.936   | 0.176    | -0.149              | -1.113  | 0.041    | -0.036           | -0.184  | 0.677    | -0.314          | -0.807  | 0.038    | -0.005                 | -0.005  | 0.988    |
|                                    |             | Low-fat diet                      |         |          |                     |         |          |                  |         |          |                 |         |          |                        |         |          |
| Dependent variable                 | VAI         | -0.241                            | -0.286  | 0.349    | -0.135              | -0.428  | 0.159    | 0.051            | 0.205   | 0.457    | -0.769          | -0.533  | 0.049    | -0.149                 | -0.121  | 0.630    |
|                                    | LAP         | -3.446                            | -0.286  | 0.480    | -1.588              | -0.352  | 0.366    | -0.294           | -0.084  | 0.818    | -1.253          | -0.061  | 0.858    | 3.036                  | 0.174   | 0.609    |
|                                    | HSI         | 1.996                             | 0.511   | 0.113    | -0.348              | -0.237  | 0.396    | -0.821           | -0.717  | 0.029    | 1.020           | 0.153   | 0.541    | 1.960                  | 0.346   | 0.189    |
|                                    | FLI         | -1.160                            | -0.066  | 0.860    | -2.003              | -0.304  | 0.405    | -2.378           | -0.463  | 0.208    | 0.726           | 0.024   | 0.940    | 3.638                  | 0.143   | 0.655    |
|                                    | AST(IU/L)   | -3.497                            | -0.402  | 0.159    | 3.147               | 0.965   | 0.007    | -0.363           | -0.142  | 0.557    | -0.781          | -0.053  | 0.815    | 2.671                  | 0.212   | 0.358    |
|                                    | ALT(IU/L)   | 2.182                             | 0.191   | 0.551    | 2.842               | 0.662   | 0.039    | -1.960           | -0.585  | 0.028    | -1.529          | -0.078  | 0.773    | 6.727                  | 0.406   | 0.165    |
|                                    | TG (mmol/l) | -0.108                            | -0.290  | 0.495    | -0.044              | -0.315  | 0.436    | 0.047            | 0.434   | 0.280    | -0.143          | -0.225  | 0.536    | -0.120                 | -0.223  | 0.535    |

BMI- body mass index, WC-waist circumference, hs-CRP – C reactive protein, VAI-visceral adiposity index, LAP – lipid accumulation products, FLI -fatty liver index, HSI-hepatic steatosis index. TG-triglycerides.
